# Supplementary material for: Low-dose radiotherapy combined with dual PD-L1 and VEGFA blockade elicits antitumor response in hepatocellular carcinoma mediated by activated intratumoral CD8+ exhausted-like T cells
Source: Springer Nature journal article supplement (doi:10.1038/s41467-023-43462-1), 2023-11-24
Supplement: MOESM1 [file 41467_2023_43462_MOESM1_ESM.pdf]

## Title:

Low-dose Radiotherapy Combined with Dual PD-L1 and VEGFA Blockade Elicits Antitumor Response in Hepatocellular Carcinoma Mediated by Activated Intratumoral CD8<sup>+</sup> exhausted-like T cells

## Supplementary Figures:

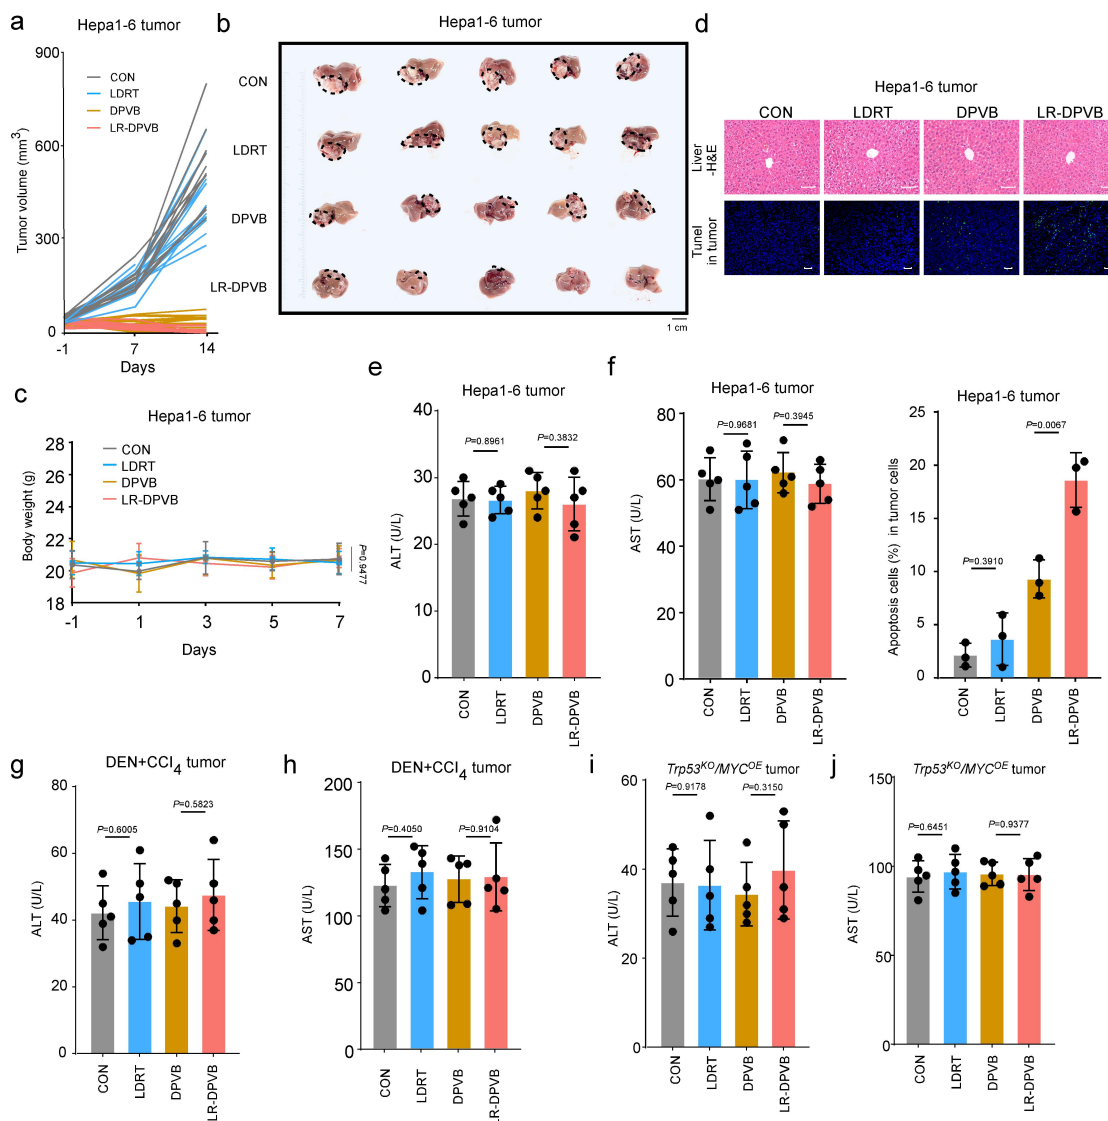

**Supplementary Fig. 1 Safety evaluations of combined local liver LDRT in combined with DPVB.**

(a) Tumor growth curves of Hepa1-6 HCC model during the therapeutic cycle evaluated by MRI. n=14 mice/group. (b) Representative image of Hepa1-6 HCC model at the end of the second therapeutic cycles (circled by black lines). n=5 mice/group. (c) Body weight changes of Hepa1-6 HCC model mice during the two therapeutic cycles. n=5 mice/group. *P* values were calculated using One-way

repeated-measures ANOVA test. **(d)** H&E staining for liver from Hepa1-6 HCC model mice (up) and Tunel assay of Hepa1-6 HCC model liver tumor (down) in each group at the end of the second therapeutic cycles. Quantification of Tunel positive cells in each group. Scale bars: 100  $\mu$ m. **(e-f)** Serum levels of alanine transaminase (ALT), aspartate aminotransferase (AST) in Hepa1-6 HCC model mice were measured at the end of the second therapeutic cycles. **(g-h)** Serum levels of alanine transaminase (ALT), aspartate aminotransferase (AST) in DEN+CCl<sub>4</sub> HCC model mice were measured at the end of the therapeutic cycles. **(i-j)** Serum levels of alanine transaminase (ALT), aspartate aminotransferase (AST) in *Trp53<sup>KO</sup>/MYC<sup>OE</sup>* HCC model mice were measured at the end of the therapeutic cycles. Data of **(d)** shown as means  $\pm$  SD derived from tumor mouse models (n=3 mice/group). Data of **(e-f)** and **(g-j)** shown as means  $\pm$  SD derived from tumor mouse models (n=5 mice/group). *P* values of **(d-j)** were calculated using a two-sided unpaired Student's *t* test. Source data are provided as a Source Data file.

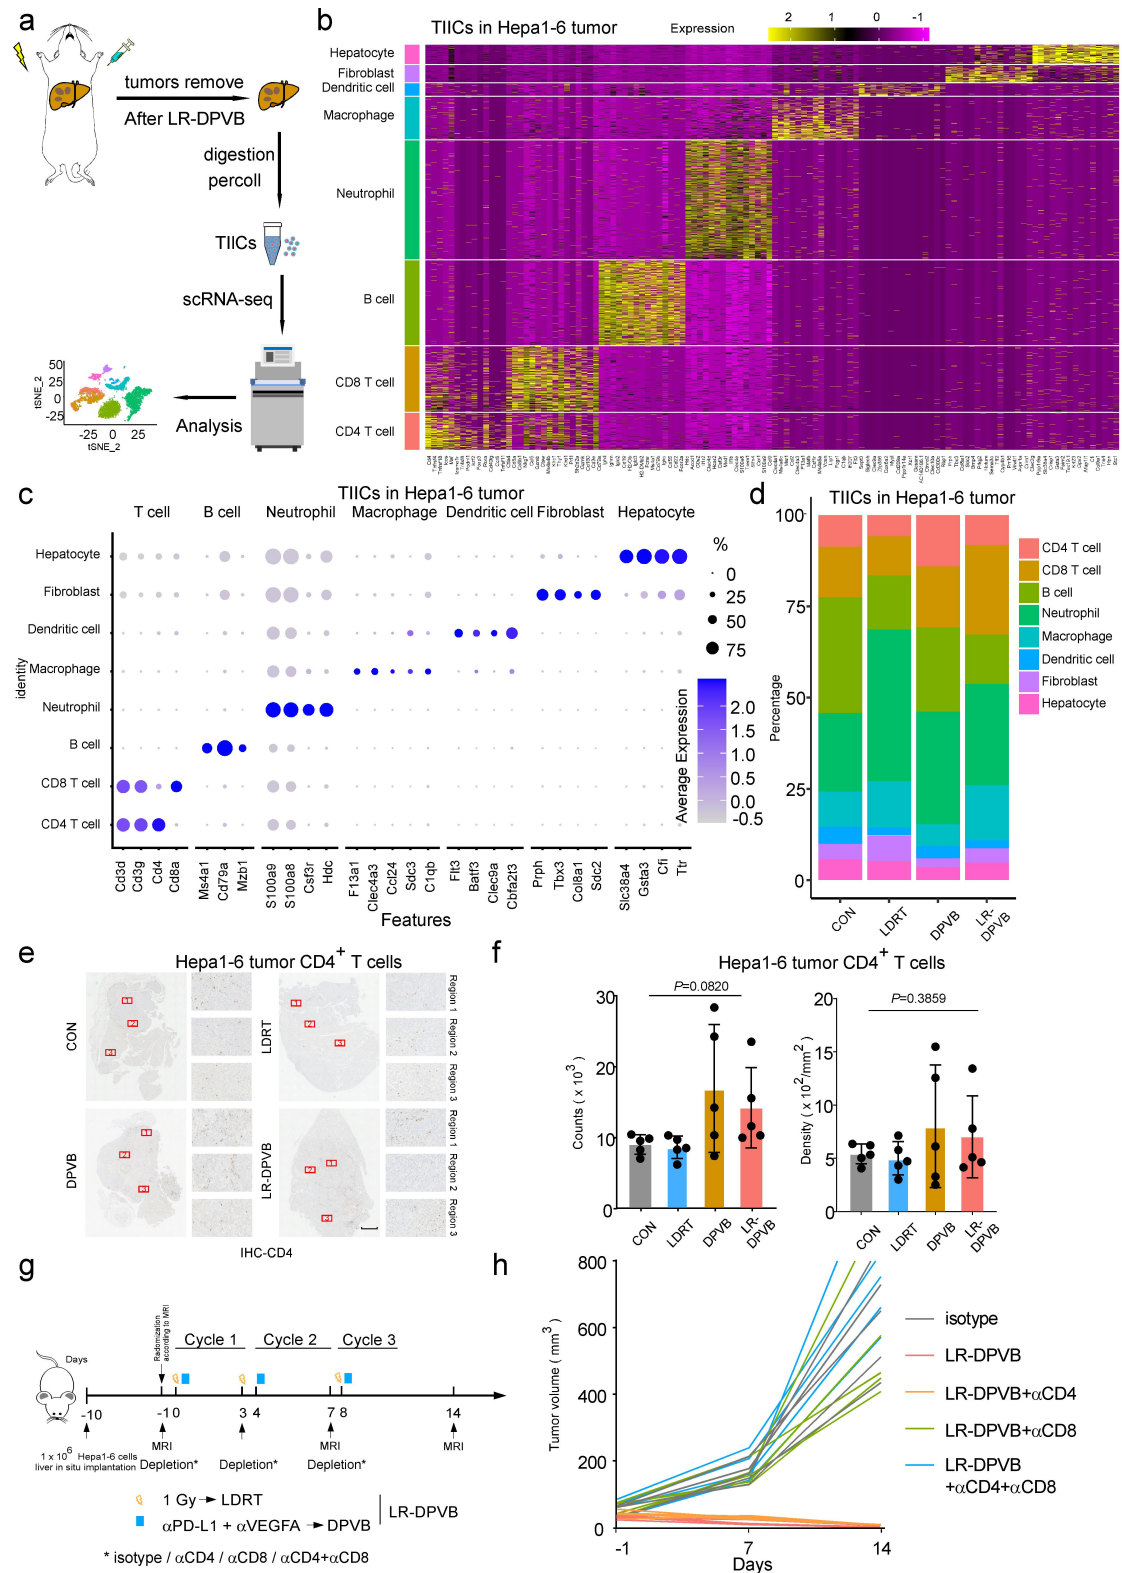

**Supplementary Fig. 2 The scRNA-seq characterization of TIICs isolated from Hepa1-6 HCC tumors with 4 different treatment.**

**(a)** The flow chart of single cells isolation and scRNA-seq. n=3 mice/group. **(b)**

Heatmap of display of cell identity marker genes. n=3 mice/group. **(c)** TIIICs expressing indicated genes across major cell populations and their corresponding average expression (size of dot indicates the percentage of cells in each population; expression intensity is indicated by color). n=3 mice/group. **(d)** Percentage stack plot representing the proportion of each cell population in different groups. n=3 mice/group. **(e-f)** Representative images **(e)** and quantification **(f)** of CD4 IHC staining in serial sections. n=5 mice/group. *P* values were calculated using a two-sided unpaired Student's *t* test. Data shown as means  $\pm$  SD. Scale bars: 500  $\mu$ m. **(g)** Schematic depiction of CD4<sup>+</sup> and/or CD8<sup>+</sup> T cell depletion experiment in Hepa1-6 bearing LR-DPVB treated mice. **(h)** Tumor growth was assessed at the indicated days. n=5 mice/group. Source data are provided as a Source Data file.



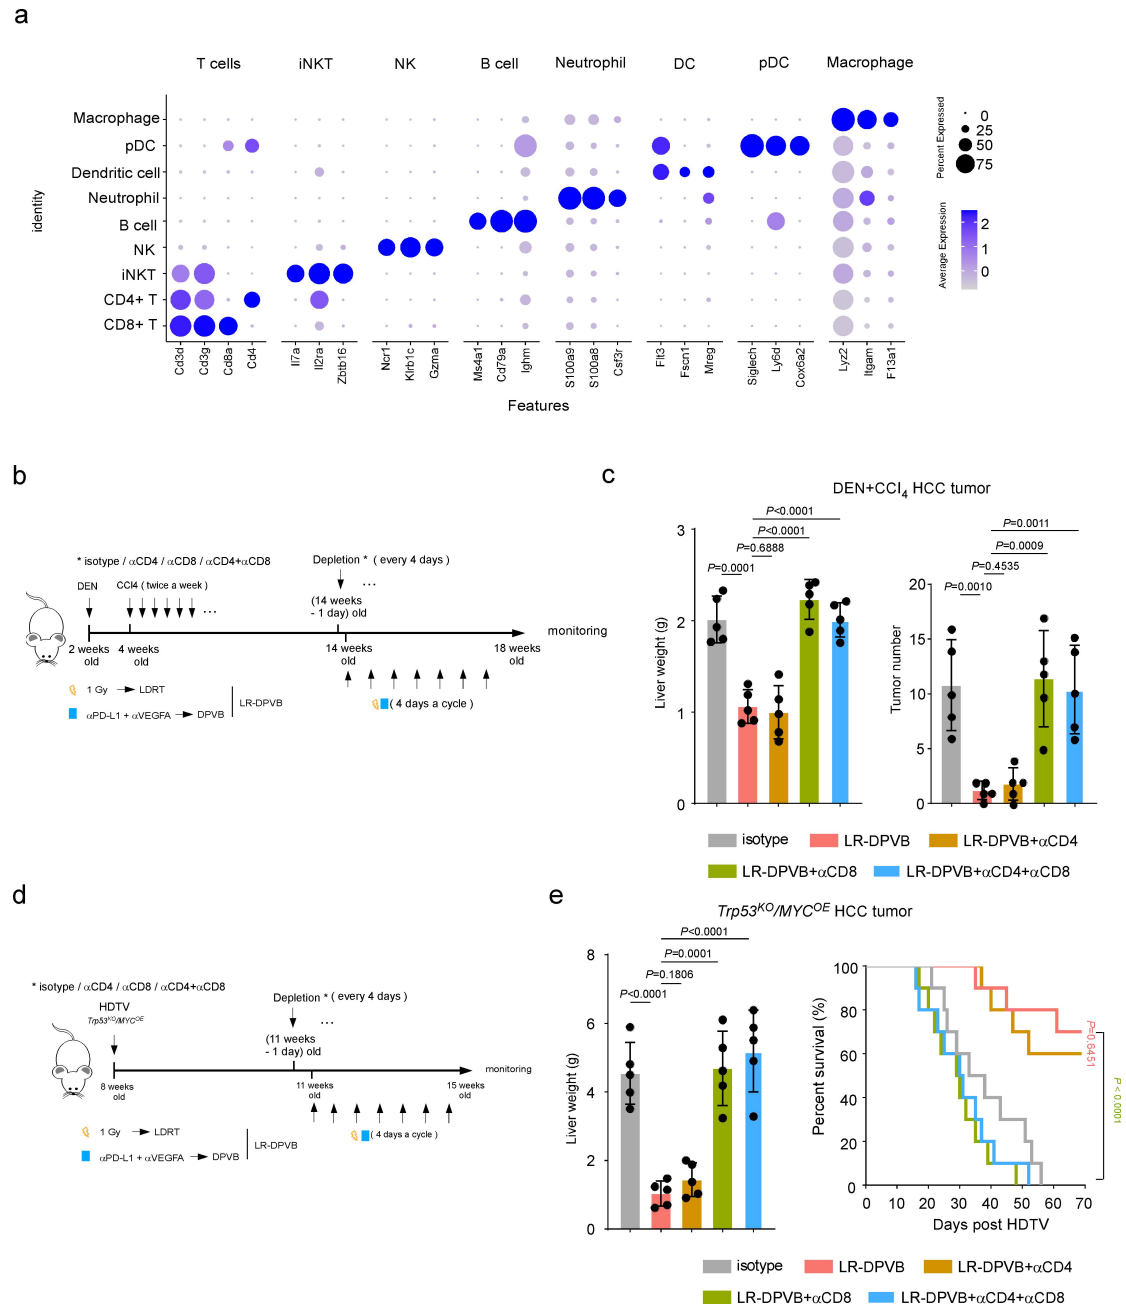

**Supplementary Fig. 3 The scRNA-seq characterization of CD45<sup>+</sup> THICs isolated from DEN+CCl<sub>4</sub> HCC tumors with 4 different treatment.**

**(a)** CD45<sup>+</sup> THICs expressing indicated genes across major cell populations and their corresponding average expression (size of dot indicates the percentage of cells in each population; expression intensity is indicated by color). n=3 mice/group. **(b)** Schematic depiction of CD4<sup>+</sup> and/or CD8<sup>+</sup> T cell depletion experiment in DEN+CCl<sub>4</sub> HCC mice. **(c)** The liver weight (left panel) and tumor number (right panel) of DEN+CCl<sub>4</sub> HCC model at the indicated groups. n=5 mice/group. *P* values were calculated using a

two-sided unpaired Student's *t* test. **(d)** Schematic depiction of CD4<sup>+</sup> and/or CD8<sup>+</sup> T cell depletion experiment in *Trp53<sup>KO</sup>/MYC<sup>OE</sup>* HCC mice. **(e)** The liver weight (left panel, n=5 mice/group, *P* values were calculated using a two-sided unpaired Student's *t* test) and Kaplan – Meier curve (right panel, n=10 mice/group, *P* values were determined by log-rank test (Mantel-Cox)) of *Trp53<sup>KO</sup>/MYC<sup>OE</sup>* HCC model at the indicated groups. Data of **(c)** and **(e)** shown as means ± SD of derived from tumor mouse models (n=5 mice/group). Source data are provided as a Source Data file.

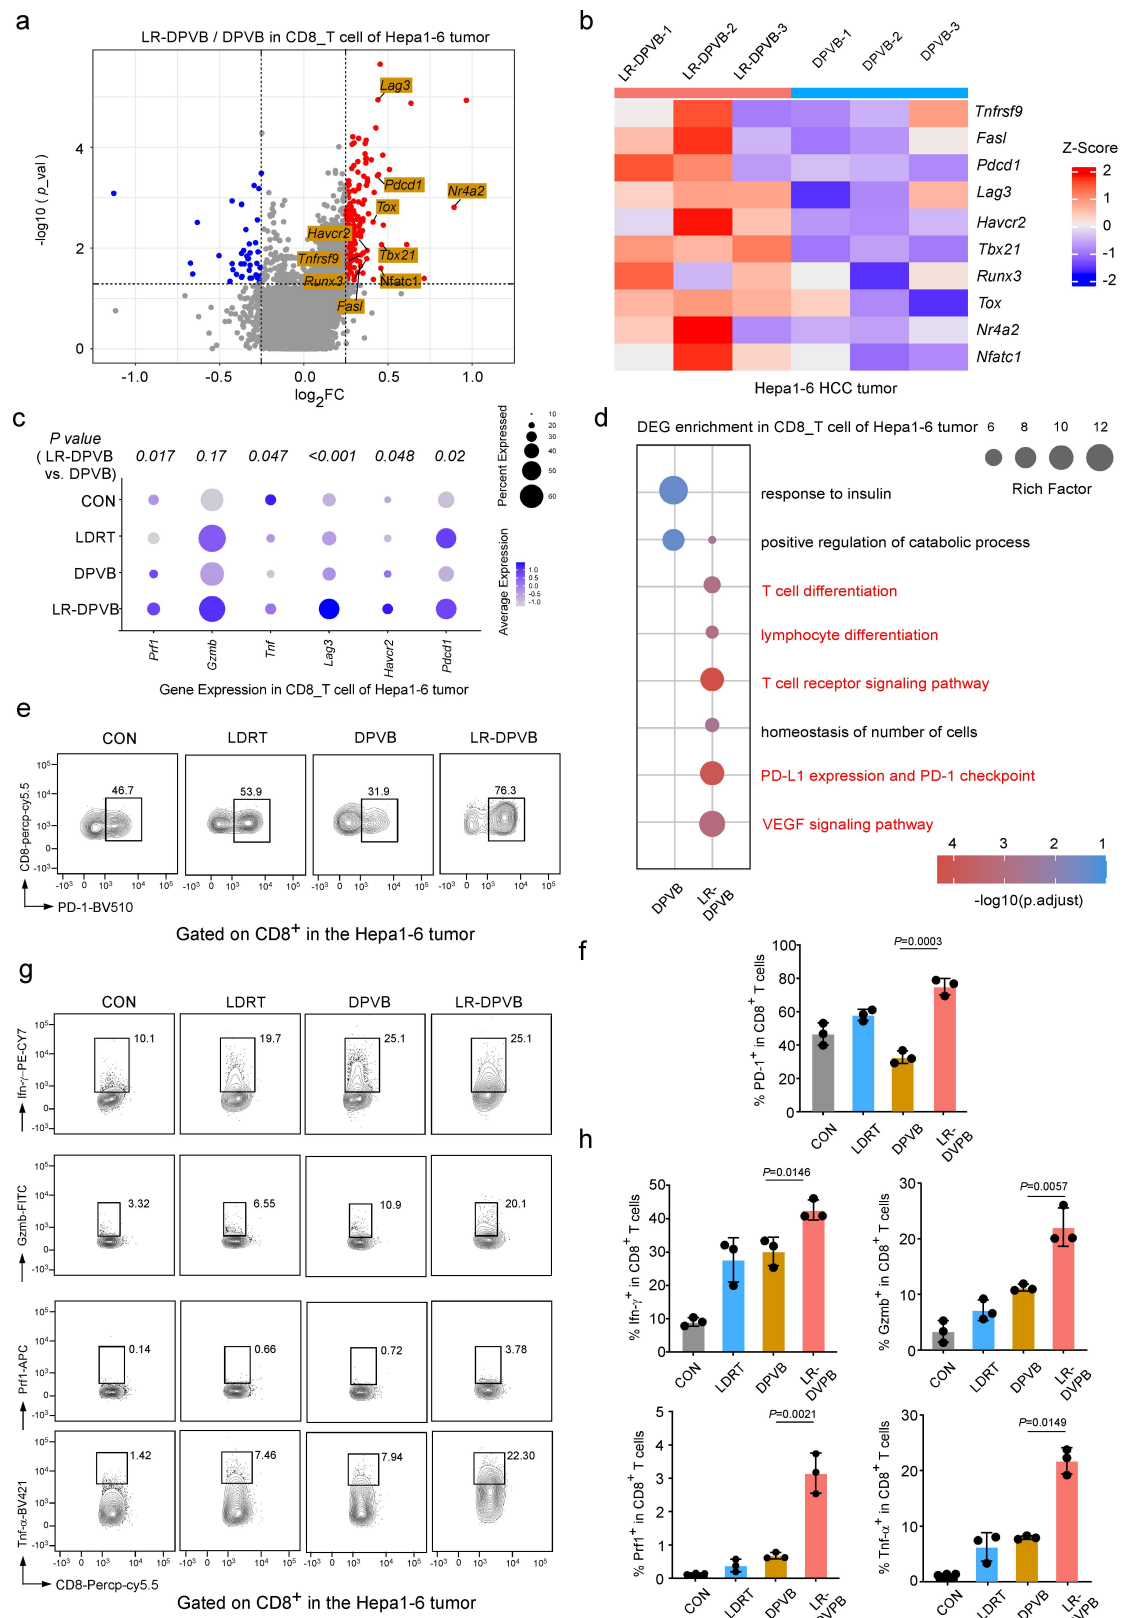

**Supplementary Fig. 4 The LR-DPVB expands the exhausted and activated of CD8<sup>+</sup> T cells in Hepa1-6 HCC tumors.**

**(a)** Volcano plot representing the differentially expressed genes (DEGs) of CD8<sup>+</sup> T

cells in Hepa1-6 HCC tumor of LR-DPVB vs DPVB, the exhausted and activated associated molecular have been highlighted. The threshold of the DEGs is  $|\log_2FC| > 0.25$ ,  $P < 0.05$ . Red = upregulated genes; blue = downregulated genes; gray = non-DEGs. **(b)** Heatmaps of the exhausted and activated associated molecular depicting gene expression patterns across the LR-DPVB and DPVB groups in Hepa1-6 HCC tumor. **(c)** Dot gram representing the expression of various exhausted and effected function markers in CD8<sub>T</sub> subsets in Hepa1-6 HCC tumor of indicated group. **(d)** Bubble chart of DEGs pathway enrichment of CD8<sub>T</sub> cells in Hepa1-6 HCC tumor with LR-DPVB and DPVB groups. **(e-f)** Representative flow cytometry plots **(e)** and quantification **(f)** of % PD-1<sup>+</sup> in CD8<sup>+</sup> T cells of Hepa1-6 HCC tumor in indicated groups. **(g-h)** Representative flow cytometry plots **(g)** and quantification **(h)** of % Prfl<sup>+</sup>, % Gzmb<sup>+</sup>, % Tnf- $\alpha$ <sup>+</sup> and % Ifn- $\gamma$ <sup>+</sup> in CD8<sup>+</sup> T cells of Hepa1-6 HCC tumor in indicated groups. Data of **(f)** and **(h)** shown as means  $\pm$  SD derived from tumor mouse models (n=3 mice/group).  $P$  values of **(f)** and **(h)** were calculated using a two-sided unpaired Student's  $t$  test. **(a-d)** n=3 mice/group. Source data are provided as a Source Data file.

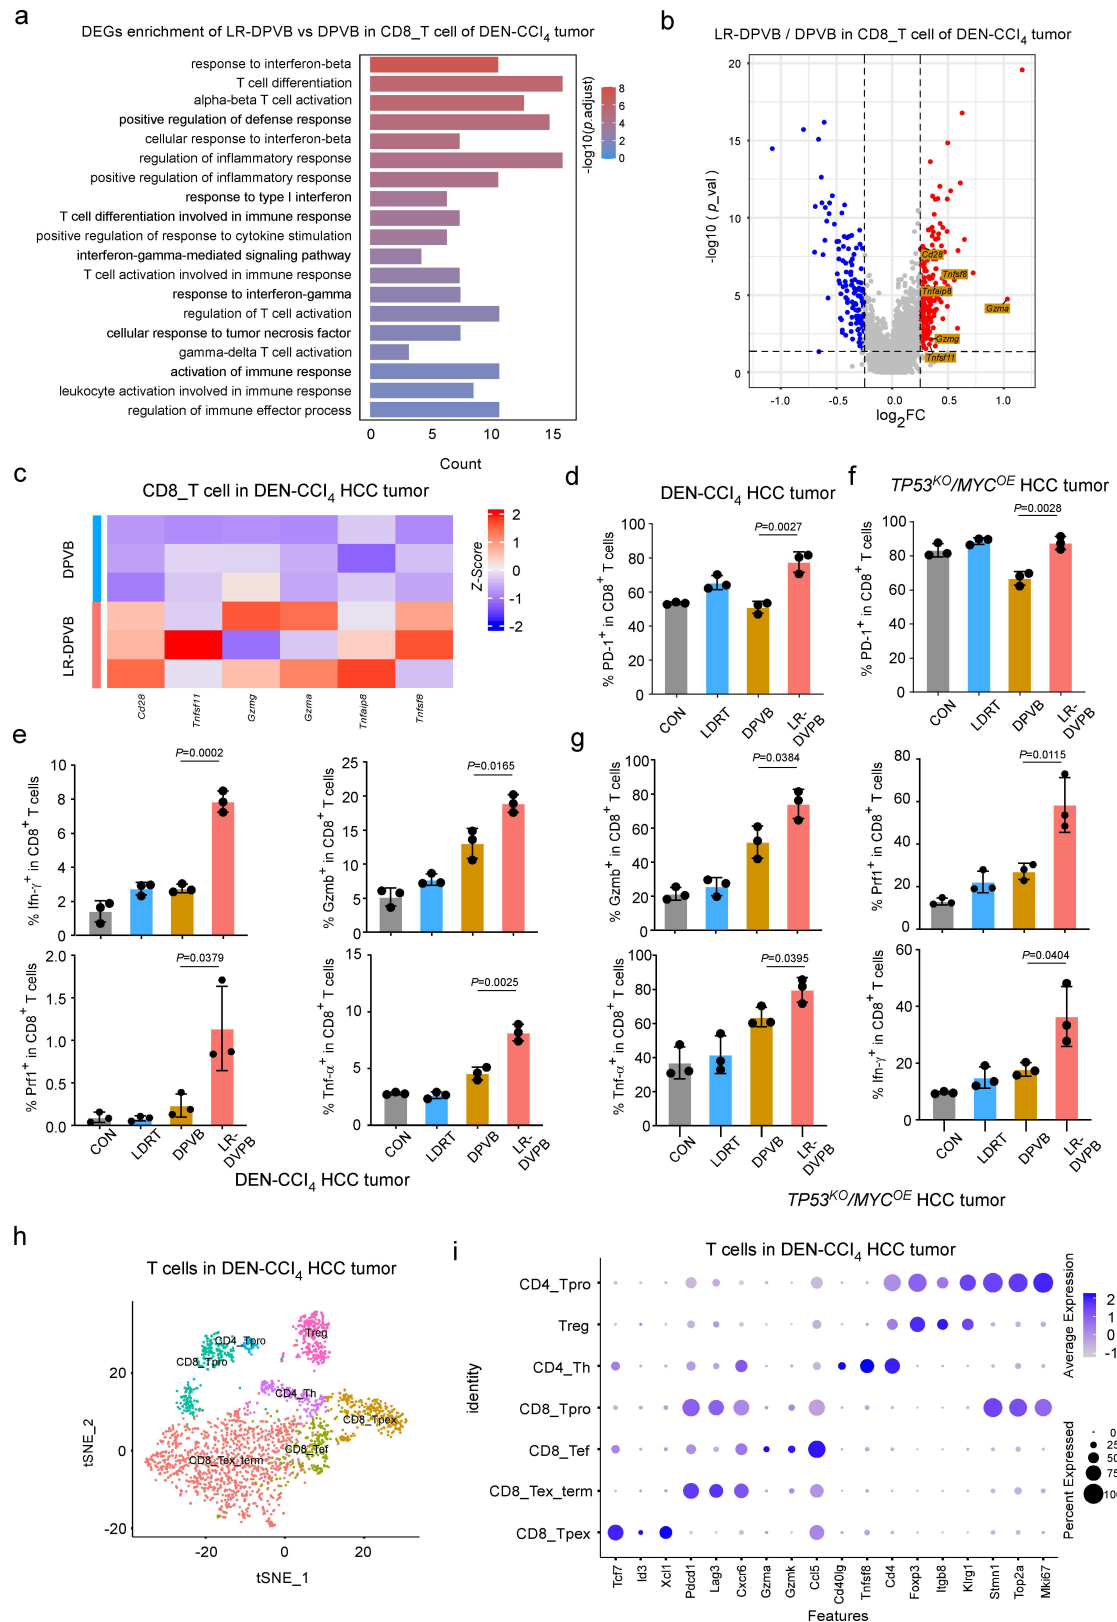

**Supplementary Fig. 5 LR-DPVB enlarged the effector function and cytolytic capacity of tumor-rejecting CD8<sub>T</sub> cell in DEN+CCl<sub>4</sub> HCC tumors and *Trp53*<sup>KO</sup>/*MYC*<sup>OE</sup> HCC tumors.**

**(a)** Bar chart of DEGs pathway enrichment of CD8<sub>T</sub> cell in DEN+CCl<sub>4</sub> HCC tumor

with LR-DPVB and DPVB groups. **(b-c)** Volcano map **(b)** and heatmap **(c)** of the activated associated molecular depicting gene expression patterns in CD8<sub>T</sub> cell across the LR-DPVB and DPVB groups in DEN+CCl<sub>4</sub> HCC tumor. **(d)** Quantification of % PD-1<sup>+</sup> in CD8<sup>+</sup> T cells of DEN+CCl<sub>4</sub> HCC tumor in indicated groups. **(e)** Quantification of % Prfl<sup>+</sup>, % Gzmb<sup>+</sup>, % Tnf-α<sup>+</sup> and % Ifn-γ<sup>+</sup> in CD8<sup>+</sup> T cells of DEN+CCl<sub>4</sub> HCC tumor in indicated groups. **(f)** Quantification of % PD-1<sup>+</sup> in CD8<sup>+</sup> T cells of *Trp53<sup>KO</sup>/MYC<sup>OE</sup>* HCC tumor in indicated groups. **(g)** Quantification of % Prfl<sup>+</sup>, % Gzmb<sup>+</sup>, % Tnf-α<sup>+</sup> and % Ifn-γ<sup>+</sup> in CD8<sup>+</sup> T cells of *Trp53<sup>KO</sup>/MYC<sup>OE</sup>* HCC tumor in indicated groups. **(h)** tSNE maps of scRNAseq data of T cell from DEN+CCl<sub>4</sub> HCC tumor (n=3 tumors per group). CD4\_Tpro = proliferating CD4\_T cell, Treg = CD4\_Treg, CD4\_Th = helper CD4\_T cell, CD8\_Tpro = proliferating CD8\_T cell, CD8\_Tef = transient effected CD8\_T cell, CD8\_Tex\_term = terminally exhausted CD8\_T cell, CD8\_Tpex = progenitor exhausted CD8\_T cell. **(i)** DEN+CCl<sub>4</sub> HCC tumor T cells expressing indicated genes across major cell subsets and their corresponding average expression (size of dot indicates the percentage of cells in each population; expression intensity is indicated by color). **(a-c)** n=3 mice/group. Data of **(d-g)** shown as means ± SD derived from tumor mouse models (n=3 mice/group). *P* values of **(d-g)** were calculated using a two-sided unpaired Student's *t* test. Source data are provided as a Source Data file.

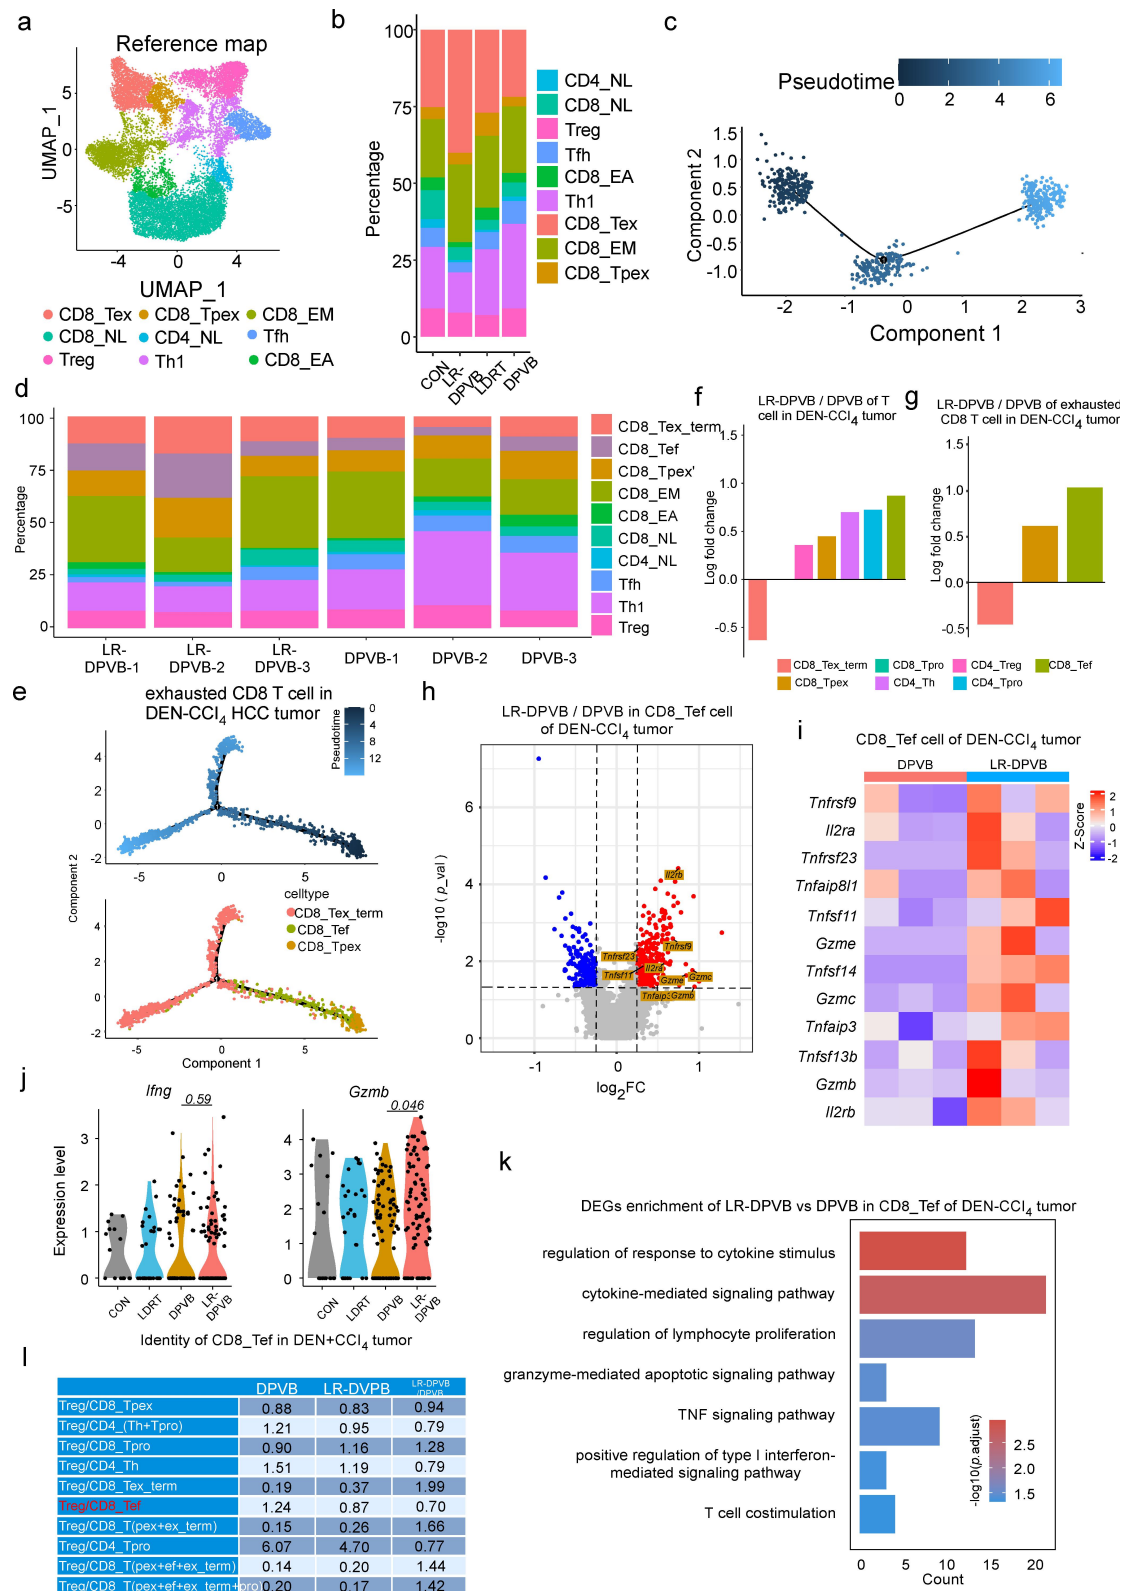

**Supplementary Fig. 6 The LR-DPVB expands the transitory effected CD8<sup>+</sup> T cells (CD8\_Tef) featured a dramatic enrichment of effector function and cytolytic capacity.**

**(a)** Reference map of UMAP plots of T cells scRNA-seq data (n=3 Hepa1-6 HCC

tumors per treatment). **(b)** Percentage stack plot representing the proportion of each cell subsets in different groups of Hepa1-6 HCC tumor. **(c)** Pseudotime trajectory analysis of CD8\_Tpex and CD8\_Tex clusters in Hepa1-6 was performed by the Monocle tool. **(d)** Percentage stack plot representing the proportion of each cell subsets in individual Hepa1-6 HCC tumor (no.1-3) from LR-DPVB or DPVB. **(e)** Pseudotime trajectory analysis of CD8\_Tpex, CD8\_Tef and CD8\_Tex\_term clusters of DEN+CCI<sub>4</sub> HCC tumor was performed by the Monocle tool. **(f)** Fold-change of T cell subsets of DEN+CCI<sub>4</sub> HCC tumor following LR-DPVB vs DPVB. **(g)** Fold-change of CD8\_Tex subsets of DEN+CCI<sub>4</sub> HCC tumor following LR-DPVB vs DPVB. **(h-i)** Volcano map **(h)** and heatmap **(i)** of the activated associated molecular depicting gene expression patterns in CD8\_Tef across the LR-DPVB and DPVB groups in DEN+CCI<sub>4</sub> HCC tumor. **(j)** Violin plot representing the expression of various exhausted and effected function markers in CD8\_Tef subsets in DEN+CCI<sub>4</sub> HCC tumor of indicated group. **(k)** Bar chart of DEGs pathway enrichment of CD8\_Tef cell in DEN+CCI<sub>4</sub> HCC tumor with LR-DPVB and DPVB groups. **(l)** Table describes Treg: CD8 or CD4 ratios in DEN+CCI<sub>4</sub> HCC tumor of LR-DPVB and DPVB groups.



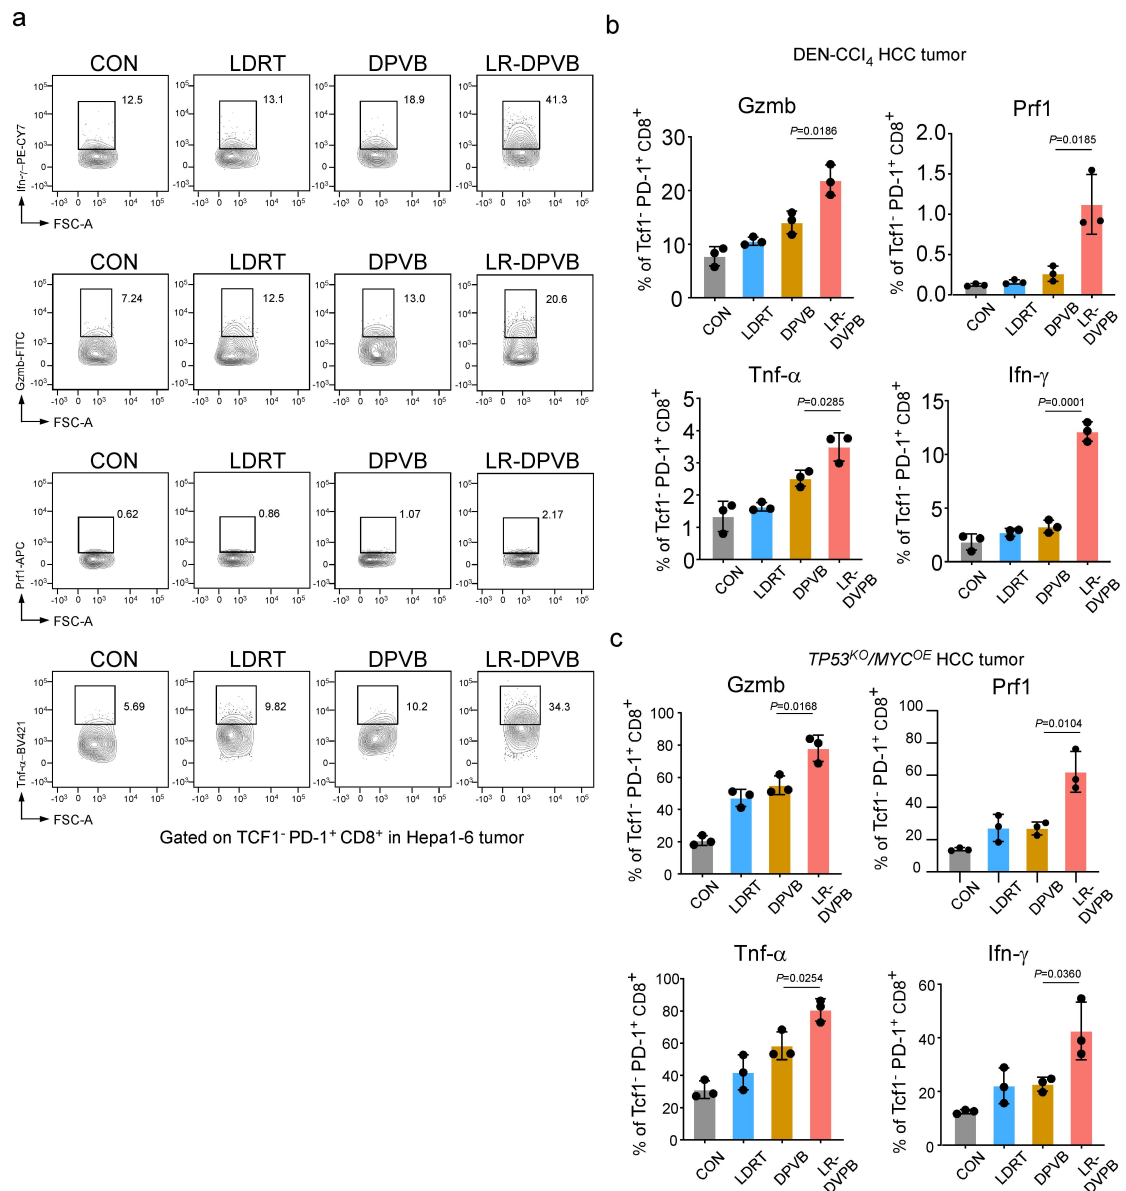

**Supplementary Fig. 7 The flow cytometry assays of intratumoral CD8<sub>T</sub> in three HCC models.**

**(a)** Representative flow cytometry plots of % Prf1<sup>+</sup>, % Gzmb<sup>+</sup>, % Tnf-α<sup>+</sup> and % Ifn-γ<sup>+</sup> in TCF1<sup>+</sup> PD-1<sup>+</sup> CD8<sup>+</sup> T cells of Hepa1-6 tumor in the indicated groups. **(b)** Quantification of flow cytometry plots of % Prf1<sup>+</sup>, % Gzmb<sup>+</sup>, % Tnf-α<sup>+</sup> and % Ifn-γ<sup>+</sup> in TCF1<sup>+</sup> PD-1<sup>+</sup> CD8<sup>+</sup> T cells of DEN+CCl<sub>4</sub> HCC tumor in the indicated groups. **(c)** Quantification of flow cytometry plots of % Prf1<sup>+</sup>, % Gzmb<sup>+</sup>, % Tnf-α<sup>+</sup> and % Ifn-γ<sup>+</sup> in TCF1<sup>+</sup> PD-1<sup>+</sup> CD8<sup>+</sup> T cells of *Trp53*<sup>KO</sup>/*MYC*<sup>OE</sup> HCC tumors in the indicated groups. Data of **(b-c)** shown as means ± SD derived from tumor mouse models (n=3 mice/group). *P* values of **(b-c)** were calculated using a two-sided unpaired Student's *t*

test. Source data are provided as a Source Data file.

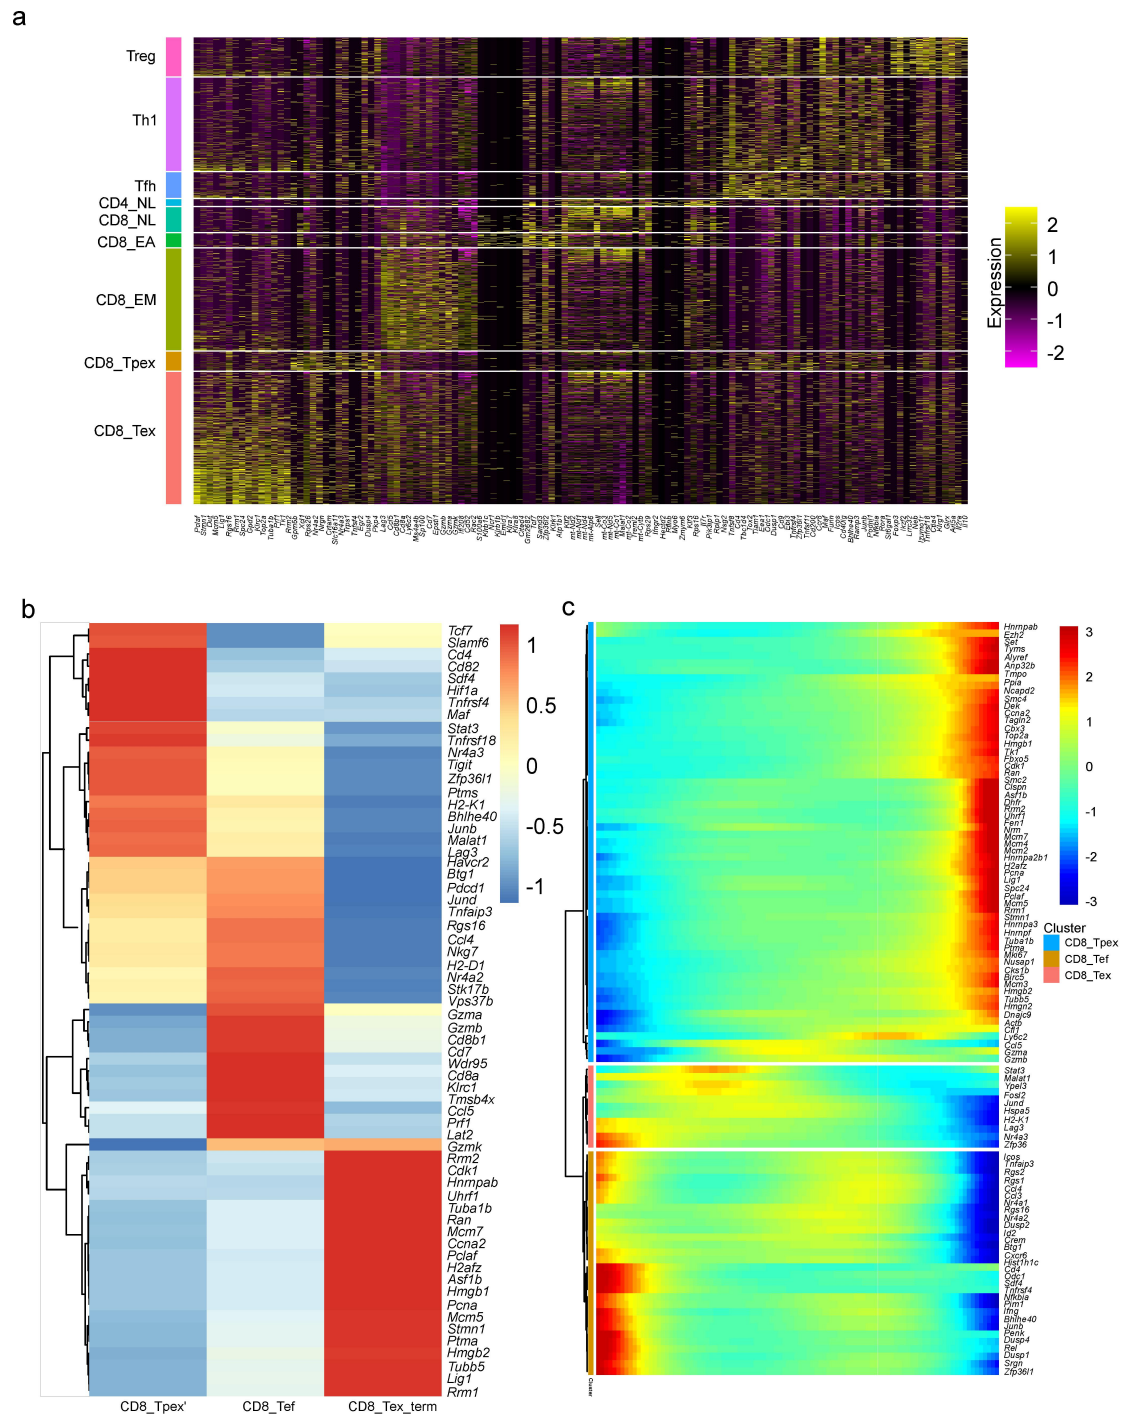

**Supplementary Fig. 8 Phenotypic characterization of intratumoral T cells.**

**(a)** The FindAllMarker function was used to calculate the tag genes of the classified cells, and the heatmap showed the top 15 tag genes of each subset. **(b)** The heatmap shows the characteristic genes of three cell subsets on the pseudotime trajectory. **(c)** The heatmap presents the top 100 genes associated with the pseudotime trajectory. **(a-c)** n=3 mice/group.

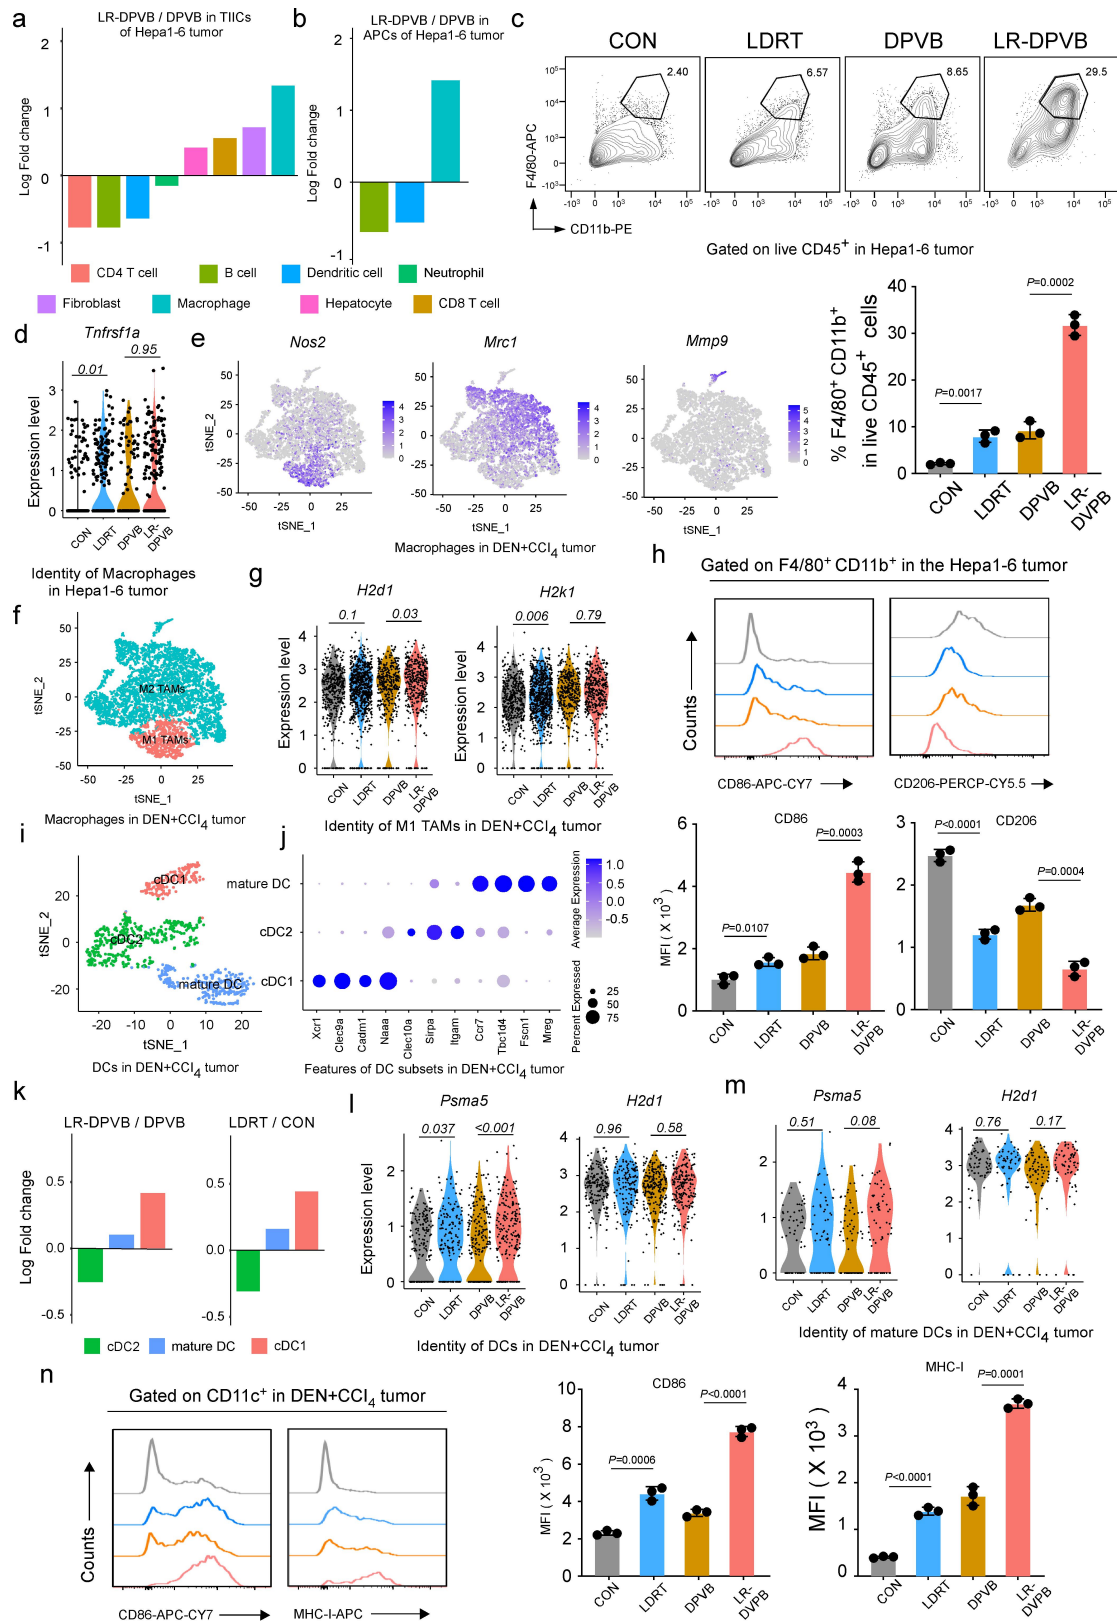

**Supplementary Fig. 9 LR-DPVB effectively enhanced the activation of the tumor's innate immune microenvironment.**

**(a)** Fold-change of TIICs populations from LR-DPVB and DPVB groups in Hepa1-6 HCC tumor. **(b)** Fold-change of antigen presented cell populations (APCs) from

LR-DPVB and DPVB groups in Hepa1-6 HCC tumor. **(c)** Representative (up panel) and quantification (down panel) of flow cytometry plots of % F4/80<sup>+</sup> CD11b<sup>+</sup> in live CD45<sup>+</sup> cells of Hepa1-6 HCC tumor THCs at the end of the therapeutic cycle. **(d)** Violin plots representing the expression of *Tnfrsf1a* in macrophage subsets of Hepa1-6 HCC tumor with indicated treatment. **(e)** tSNE map of the indicated marker in macrophages of DEN+CCl<sub>4</sub> tumor. **(f)** tSNE map of the M1-type and M2-type macrophages of DEN+CCl<sub>4</sub> tumor. **(g)** Violin plots representing the expression of *H2dl* and *H2kl* in M1-type tumor-associated macrophage (TAMs) of DEN+CCl<sub>4</sub> tumor with indicated treatment. **(h)** Expression of CD86 and CD206 of F4/80<sup>+</sup> CD11b<sup>+</sup> cells in the Hepa1-6 HCC tumor with indicated treatment. Data shown as means  $\pm$  SD of three independent experiments. **(i)** tSNE maps of scRNAseq data from DCs of DEN+CCl<sub>4</sub> tumor (n=3 per group). **(j)** DCs expressing indicated genes across major cell populations and their corresponding average expression (size of dot indicates the percentage of cells in each population; expression intensity is indicated by color). **(k)** Fold-change of DCs populations from LR-DPVB and DPVB groups (left panel) and LDRT and CON groups (right panel) in DEN+CCl<sub>4</sub> tumor. **(l-m)** Violin plots representing the expression of *Pasma5* and *H2dl* in DCs **(l)** and mature DCs **(m)** of DEN+CCl<sub>4</sub> tumor with indicated treatment. **(n)** Expression of CD86 and MHC-I of CD11c<sup>+</sup> cells in the Hepa1-6 HCC tumor with indicated treatment. **(a-n)** n=3 mice/group. Data of **(c)**, **(h)** and **(n)** shown as means  $\pm$  SD derived from tumor mouse models (n=3 mice/group). *P* values of **(c)**, **(h)** and **(n)** were calculated using a two-sided unpaired Student's *t* test. Source data are provided as a Source Data file.

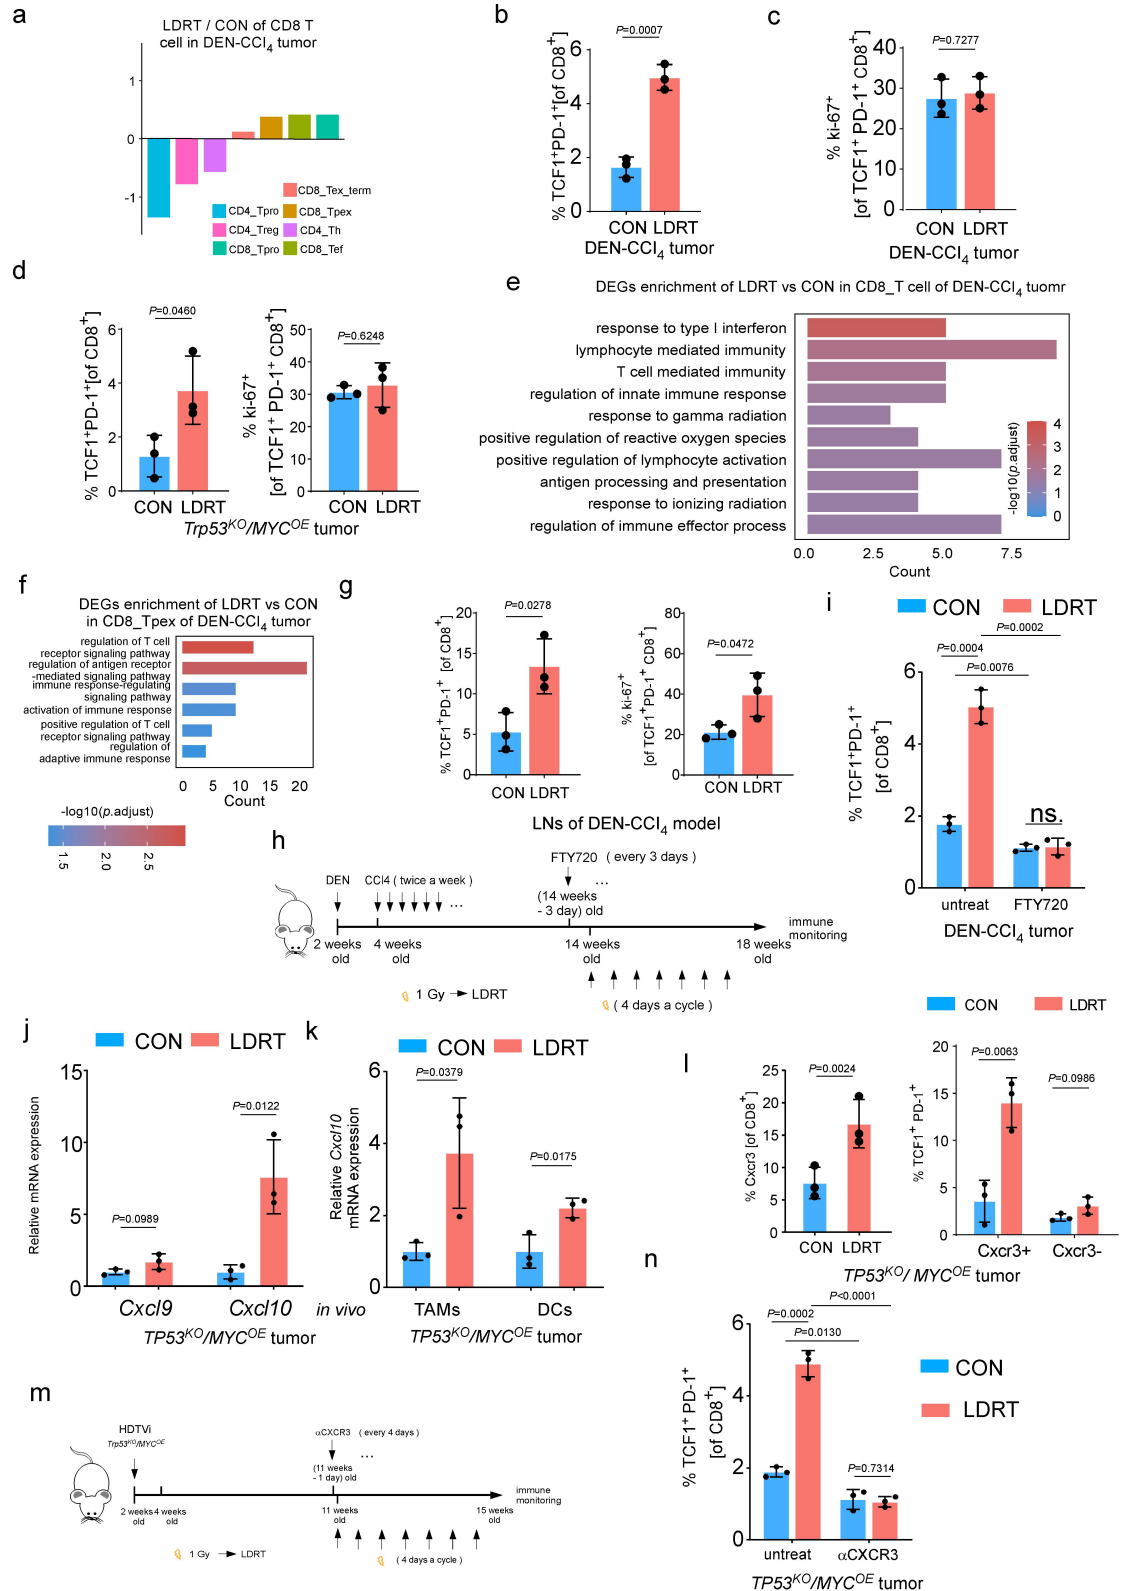

**Supplementary Fig. 10 LDRT-induced intratumoral stem-like CD8\_Tpex was recruited from the dLNs through by CXCL10/CXCR3 axis.**

**(a)** Fold-change of T cell subsets following LDRT vs CON in DEN+CCl<sub>4</sub> model.  $n=3$  mice/group. **(b-c)** Flow cytometry quantification of % TCF1<sup>+</sup> PD-1<sup>+</sup> in CD8<sup>+</sup> T cells

and % Ki-67<sup>+</sup> in TCF1<sup>+</sup> PD-1<sup>+</sup> CD8<sup>+</sup> T cells of the indicated groups in DEN-CCl<sub>4</sub> model. **(d)** Flow cytometry quantification of % TCF1<sup>+</sup> PD-1<sup>+</sup> in CD8<sup>+</sup> T cells (left panel) and % Ki-67<sup>+</sup> in TCF1<sup>+</sup> PD-1<sup>+</sup> CD8<sup>+</sup> T cells (right panel) of the indicated groups in *Trp53<sup>KO</sup>/MYC<sup>OE</sup>* model. **(e)** Bar chart of DEGs pathway enrichment of CD8<sub>T</sub> cell in DEN+CCl<sub>4</sub> HCC tumor with LDRT and CON groups. n=3 mice/group. **(f)** Bar chart of DEGs pathway enrichment of CD8<sub>Tpex</sub> in DEN+CCl<sub>4</sub> HCC tumor with LR-DPVB and DPVB groups. n=3 mice/group. **(g)** Flow cytometry quantification of % TCF1<sup>+</sup> PD-1<sup>+</sup> in CD8<sup>+</sup> T cells and % Ki-67<sup>+</sup> in TCF1<sup>+</sup> PD-1<sup>+</sup> CD8<sup>+</sup> T cells of the dLNs of indicated groups in DEN-CCl<sub>4</sub> model. **(h-i)** Schematic FTY720 in DEN-CCl<sub>4</sub> LDRT treated mice **(h)** and quantification of % TCF1<sup>+</sup> PD-1<sup>+</sup> in CD8<sup>+</sup> T cells in the tumors of the indicated groups **(i)**. **(j)** Relative mRNA expression of *Cxcl9* and *Cxcl10* in LDRT and CON groups of *Trp53<sup>KO</sup>/MYC<sup>OE</sup>* tumor tissue. **(k)** Relative mRNA expression of *Cxcl10* in LDRT and CON groups of tumor-associated macrophages (TAMs, F4/80<sup>+</sup> CD11b<sup>+</sup> CD45<sup>+</sup> L/D<sup>-</sup>) and DCs (CD11c<sup>+</sup> CD45<sup>+</sup> L/D<sup>-</sup>) cells sorted from tumor-infiltrated immune cells (TIICs) of *Trp53<sup>KO</sup>/MYC<sup>OE</sup>* tumor. **(l)** Quantification flow cytometry of % CXCR3<sup>+</sup> in CD8<sup>+</sup> T cells (left panel), % TCF1<sup>+</sup> PD-1<sup>+</sup> in CXCR3<sup>+</sup> CD8<sup>+</sup> T cells and CXCR3<sup>-</sup> CD8<sup>+</sup> T cells (right panel) in the *Trp53<sup>KO</sup>/MYC<sup>OE</sup>* tumors of the indicated groups. **(m-n)** Schematic depiction of anti-CXCR3 in LDRT-treated *Trp53<sup>KO</sup>/MYC<sup>OE</sup>* mice **(m)** and quantification of % TCF1<sup>+</sup> PD-1<sup>+</sup> in CD8<sup>+</sup> T cells in the tumors of the indicated groups **(n)**. Data of **(b-d)**, **(g)**, **(i-l)** and **(n)** shown as means ± SD derived from tumor mouse models (n=3 mice/group). *P* values of **(b-d)**, **(g)**, **(i-l)** and **(n)** were calculated using a two-sided unpaired Student's *t* test. Source data are provided as a Source Data file.

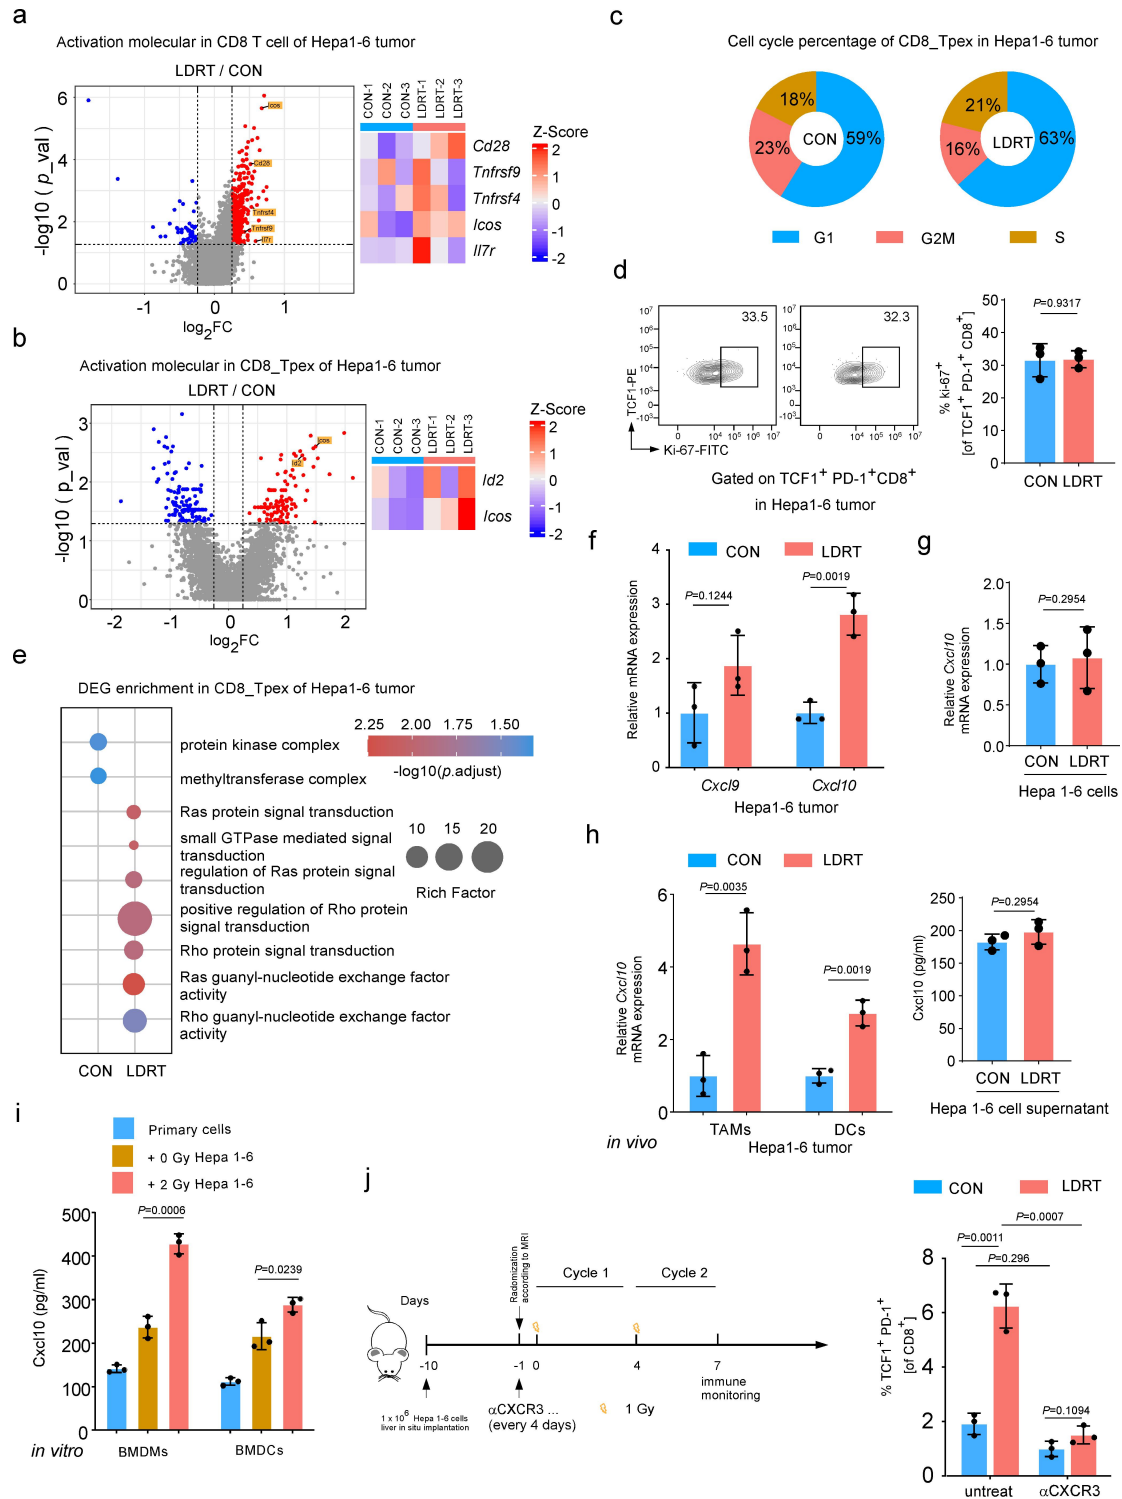

**Supplementary Fig. 11 Role of peripheral lymphatic trafficking in intratumoral stem-like CD8<sup>+</sup> Tpex accumulation via CXCL10/CXCR3 axis.**

**(a-b)** Volcano plot representing the DEGs of LDRT vs CON in CD8 T cell **(a)** and CD8\_Tpex **(b)**, the activation molecular have been highlighted (left panel). The threshold of the DEGs is  $|\log_2FC| > 0.25$ ,  $P < 0.05$ . Red = upregulated genes; blue = downregulated genes; gray = non-DEGs. Heatmaps (right panel) of the activation



molecular depicting gene expression patterns across the LDRT and CON groups in CD8<sup>+</sup> T cells **(a)** and CD8<sub>Tpex</sub> **(b)**. n=3 mice/group. **(c)** Pie chart depicting the % of the cell cycle of CD8<sub>Tpex</sub> in LDRT and CON groups. n=3 mice/group. **(d)** Representative flow cytometry plots (left panel) and quantification (right panel) of % Ki-67<sup>+</sup> in TCF1<sup>+</sup> PD-1<sup>+</sup> CD8<sup>+</sup> T cells of the indicated groups. **(e)** Bubble chart of DEG pathway enrichment of CD8<sub>Tpex</sub> in LDRT and CON groups. n=3 mice/group. **(f)** Relative mRNA expression of *Cxcl9* and *Cxcl10* in LDRT and CON groups of Hepa1-6 tumor tissue. **(g)** Relative mRNA expression of *Cxcl10* in Hepa1-6 cells (up panel) and protein level of of Cxcl10 of supernatant of Hepa1-6 cells in LDRT and CON groups (down panel). **(h)** Relative mRNA expression of *Cxcl10* in LDRT and CON groups of tumor-associated macrophages (TAMs, F4/80<sup>+</sup> CD11b<sup>+</sup> CD45<sup>+</sup> L/D<sup>-</sup>) and DCs (CD11c<sup>+</sup> CD45<sup>+</sup> L/D<sup>-</sup>) cells sorted from tumor-infiltrated immune cells (TIICs). **(i)** The protein level of of Cxcl10 of supernatant of the indicated groups of *in vitro* co-culture assays. **(j)** Schematic depiction of anti-CXCR3 in Hepa1-6 bearing LDRT treated mice (up panel) and quantification of % TCF1<sup>+</sup> PD-1<sup>+</sup> in CD8<sup>+</sup> T cells in the tumors of the indicated groups (down panel). Data of **(d)**, **(f)**, **(h)** and **(j)** shown as means  $\pm$  SD derived from tumor mouse models (n=3 mice/group). Data of **(g)** and **(i)** shown as means  $\pm$  SD of 3 independent biological experiments. *P* values of **(d)** and **(f-j)** were calculated using a two-sided unpaired Student's *t* test. Source data are provided as a Source Data file.

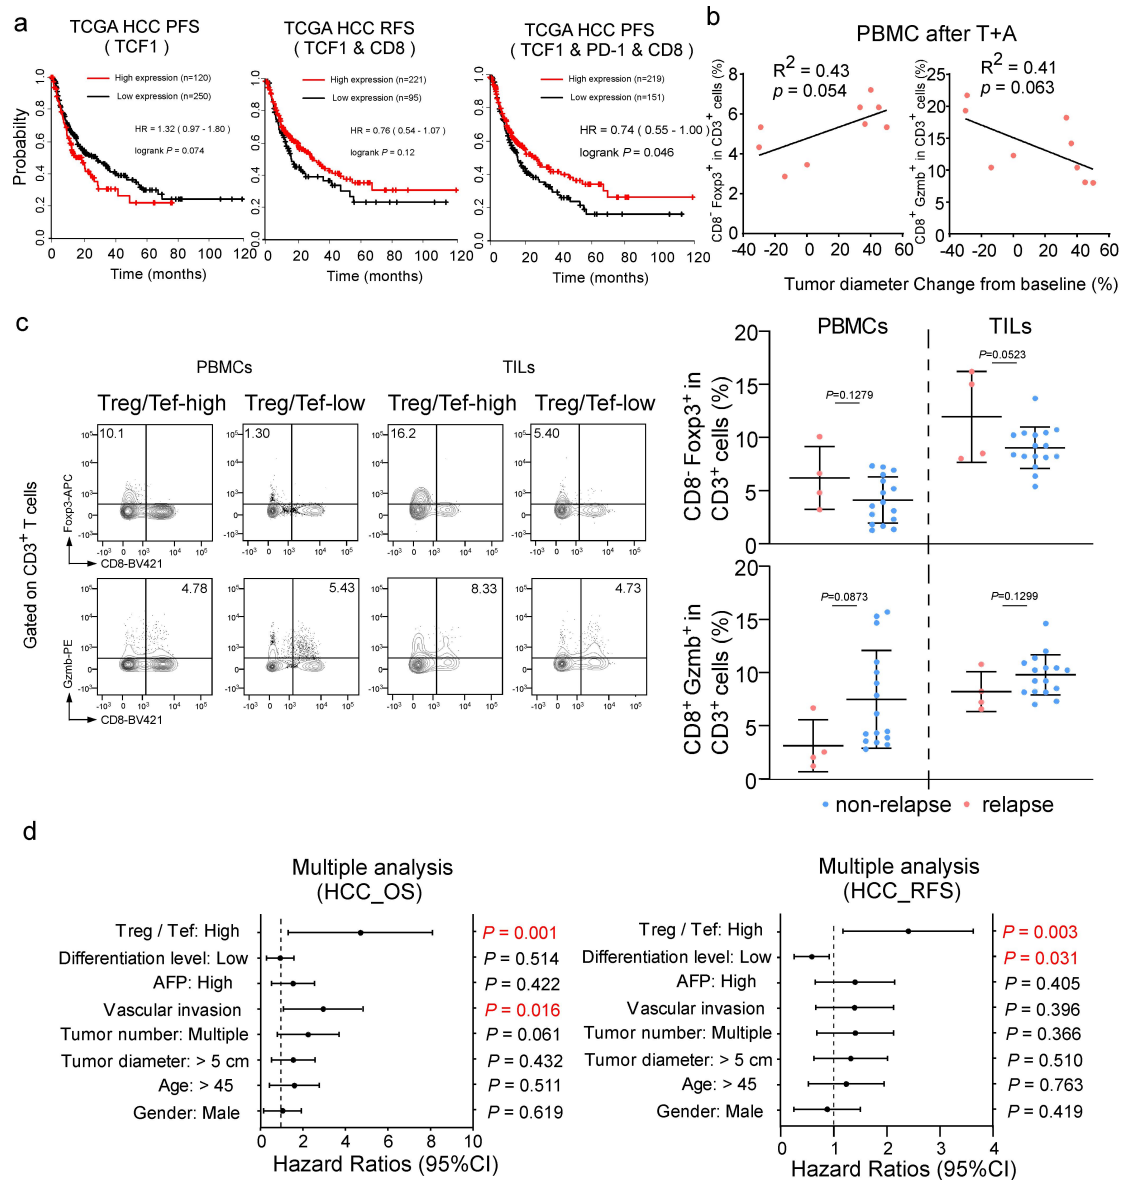

**Supplementary Fig. 12 Low infiltration of stem-like CD8<sup>+</sup> T<sub>pex</sub> and high Treg/Tef ratio correlates with poor prognosis in HCC.**

(a) The Kaplan–Meier Plotter (<http://kmplot.com/analysis>) program was used to analyze the infiltration of stem-like CD8<sup>+</sup> T<sub>pex</sub> in progress-free survival (PFS) of HCC. (b) Graphs depict correlation between the tumor diameter change from baseline (%) and Treg (%) or Tef (%).  $P$  value and  $R^2$  value were calculated using linear regression analysis ( $n=9$ ). (c) Representative flow cytometry plots (left panel) and quantification (right panel) of Treg/Tef of PBMC or TILs in the indicated HCC groups. Relapse:  $n=4$ . non-relapse:  $n=16$ .  $P$  values were calculated using a two-sided unpaired Student's  $t$  test. Data of shown as means  $\pm$  SD. (d) Multivariate Cox

regression analysis to evaluate the significance of the association between the Treg/Tef signature of 5-year OS and 5-year RFS in the presence of other clinical variables. Source data are provided as a Source Data file.

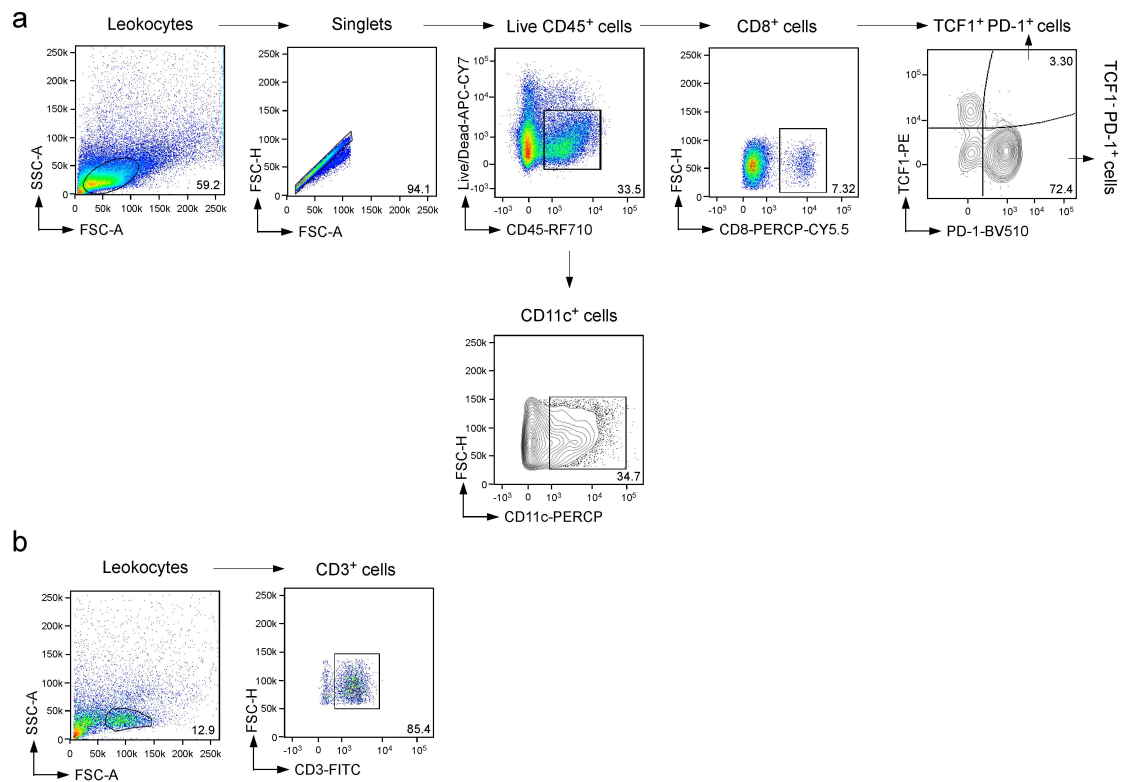

**Supplementary Fig. 13 Gating strategy.**

**(a)** Gating strategy used in Fig. 2, 4, 5, 7 and Supplementary Fig. 4, 5, 7, 9-11. **(b)** Gating strategy used in Fig. 7 and Supplementary Fig. 12.

**Supplementary Tables:****Supplementary Table 1. Clinical information of HCC patients with T+A treatment.**

| patient No. | TCF1 <sup>+</sup> PD1 <sup>+</sup> CD8 <sup>+</sup><br>/CD8 <sup>+</sup> cells (%) | Therapeutic effect of T+A |
|-------------|------------------------------------------------------------------------------------|---------------------------|
| 1           | 4.16                                                                               | PR                        |
| 2           | 8.3                                                                                | PR                        |
| 3           | 10                                                                                 | PR                        |
| 4           | 2.72                                                                               | SD                        |
| 5           | 2                                                                                  | SD                        |
| 6           | 1.25                                                                               | PD                        |
| 7           | 1.76                                                                               | PD                        |
| 8           | 3                                                                                  | SD                        |
| 9           | 2.67                                                                               | SD                        |

**Supplementary Table 2. Clinical information of HCC patients with T+A treatment.**

| patient No. | Therapeutic effect of T+A | change from baseline | Treg (%) in PBMC | Tef (%) in PBMC | Treg/Tef in PBMC |
|-------------|---------------------------|----------------------|------------------|-----------------|------------------|
| 1           | PR                        | -30%                 | 5.35             | 8.03            | 0.666251557      |
| 2           | PD                        | 50%                  | 6.35             | 8.12            | 0.782019704      |
| 3           | SD                        | -14%                 | 7.21             | 10.45           | 0.689952153      |
| 4           | PD                        | 36.40%               | 5.51             | 14.21           | 0.387755102      |
| 5           | PD                        | 40%                  | 6.35             | 18.24           | 0.348135965      |
| 6           | PD                        | 33.30%               | 3.46             | 12.29           | 0.281529699      |
| 7           | PD                        | 45%                  | 2.88             | 10.45           | 0.275598086      |
| 8           | PR                        | -29.10%              | 5.35             | 21.75           | 0.245977011      |
| 9           | PD                        | 0%                   | 4.34             | 19.35           | 0.224289406      |

**Supplementary Table 3. Clinical information of primary HCC with surgical resection.**

| patient<br>No. | recurrence status<br>within 6<br>months | Treg (%)<br>in<br>PBMCs | Tef (%)<br>in<br>PBMCs | Treg/Tef<br>in<br>PBMCs | Treg (%)<br>in THCs | Tef (%)<br>in THCs | Treg/Tef<br>in THCs |
|----------------|-----------------------------------------|-------------------------|------------------------|-------------------------|---------------------|--------------------|---------------------|
| 1              | 0                                       | 1.69                    | 4.49                   | 0.38                    | 6.36                | 8.16               | 0.78                |
| 2              | 0                                       | 6.52                    | 9.01                   | 0.72                    | 5.4                 | 8.16               | 0.66                |
| 3              | 0                                       | 3.94                    | 15.7                   | 0.25                    | 8.37                | 7.33               | 1.14                |
| 4              | 1                                       | 10.1                    | 6.68                   | 1.51                    | 8.51                | 8.25               | 1.03                |
| 5              | 0                                       | 3.12                    | 14.7                   | 0.21                    | 10.22               | 9.23               | 1.11                |
| 6              | 0                                       | 1.29                    | 3.45                   | 0.37                    | 8.12                | 8.23               | 0.99                |
| 7              | 0                                       | 1.37                    | 3.57                   | 0.38                    | 9.23                | 9.23               | 1.00                |
| 8              | 0                                       | 1.84                    | 11                     | 0.17                    | 8.23                | 10.27              | 0.80                |
| 9              | 1                                       | 3.23                    | 2.04                   | 1.58                    | 15                  | 10.8               | 1.39                |
| 10             | 0                                       | 2.78                    | 15.3                   | 0.18                    | 8.24                | 10.45              | 0.79                |
| 11             | 1                                       | 4.83                    | 1.21                   | 3.99                    | 16.2                | 7.23               | 2.24                |
| 12             | 0                                       | 2.33                    | 4.24                   | 0.55                    | 8.24                | 10.25              | 0.80                |
| 13             | 0                                       | 7.23                    | 6.16                   | 1.17                    | 10.74               | 8.53               | 1.26                |
| 14             | 0                                       | 4.83                    | 3.89                   | 1.24                    | 9.23                | 10.92              | 0.85                |
| 15             | 0                                       | 6.64                    | 2.56                   | 2.59                    | 8.01                | 6.57               | 1.22                |
| 16             | 0                                       | 5.21                    | 4.33                   | 1.20                    | 10.45               | 10.24              | 1.02                |
| 17             | 0                                       | 3.56                    | 7.88                   | 0.45                    | 7.23                | 11.38              | 0.64                |
| 18             | 0                                       | 7.34                    | 3.23                   | 2.27                    | 13.67               | 7.03               | 1.94                |
| 19             | 0                                       | 6.94                    | 2.8                    | 2.48                    | 10.23               | 14.63              | 0.70                |
| 20             | 0                                       | 5.93                    | 10.04                  | 0.59                    | 10.41               | 12.03              | 0.87                |

**Supplementary Table 4. Clinicopathological characteristics of 120 patients with primary HCC.**

| Parameters                           | Number of cases (%) |
|--------------------------------------|---------------------|
| <b>Gender</b>                        |                     |
| Male                                 | 103 (85.8)          |
| Female                               | 17 (14.2)           |
| <b>Age</b>                           |                     |
| ≤ 45                                 | 33 (27.5)           |
| > 45                                 | 87 (72.5)           |
| <b>Tumor diameter</b>                |                     |
| ≤ 5 cm                               | 61 (50.8)           |
| > 5 cm                               | 59 (49.2)           |
| <b>Tumor number</b>                  |                     |
| Single                               | 81 (67.5)           |
| Multiple                             | 39 (32.5)           |
| <b>Vascular invasion</b>             |                     |
| No                                   | 70 (58.3)           |
| Yes                                  | 50 (41.7)           |
| <b>AFP</b>                           |                     |
| < 400 ng/ml                          | 84 (70.0)           |
| ≥ 400 ng/ml                          | 36 (30.0)           |
| <b>Degree of differentiation</b>     |                     |
| Intermediate and high                | 41 (34.1)           |
| Low                                  | 79 (65.9)           |
| <b>5-years vital status</b>          |                     |
| Alive                                | 78 (65)             |
| Dead                                 | 42 (35)             |
| <b>Relapse status within 5 years</b> |                     |
| No                                   | 52 (43.3)           |
| Yes                                  | 68 (56.7)           |
| <b>Treg/Tef ratio level</b>          |                     |
| Low                                  | 60 (50.0)           |
| High                                 | 60 (50.0)           |



**Supplementary Table 5. Correlation between Treg/Tef and clinicopathological characteristics of patients with primary HCC.**

| Characteristics                      | Treg / Tef ratio level  |                          | <i>P</i> values   |
|--------------------------------------|-------------------------|--------------------------|-------------------|
|                                      | Low,<br>no. of<br>cases | High,<br>no. of<br>cases |                   |
| <b>Gender</b>                        |                         |                          |                   |
| Male                                 | 51                      | 52                       | 0.793             |
| Female                               | 9                       | 8                        |                   |
| <b>Age</b>                           |                         |                          |                   |
| ≤ 45                                 | 19                      | 14                       | 0.307             |
| > 45                                 | 41                      | 46                       |                   |
| <b>Tumor diameter</b>                |                         |                          |                   |
| ≤ 5 cm                               | 32                      | 29                       | 0.584             |
| > 5 cm                               | 28                      | 31                       |                   |
| <b>Tumor number</b>                  |                         |                          |                   |
| Single                               | 46                      | 35                       | <b>0.032</b>      |
| Multiple                             | 14                      | 25                       |                   |
| <b>Vascular invasion</b>             |                         |                          |                   |
| No                                   | 39                      | 31                       | 0.139             |
| Yes                                  | 21                      | 29                       |                   |
| <b>AFP</b>                           |                         |                          |                   |
| < 400 ng/ml                          | 45                      | 39                       | 0.232             |
| ≥ 400 ng/ml                          | 15                      | 21                       |                   |
| <b>Degree of differentiation</b>     |                         |                          |                   |
| Intermediate and high                | 18                      | 23                       | 0.336             |
| Low                                  | 42                      | 37                       |                   |
| <b>5-years vital status</b>          |                         |                          |                   |
| Alive                                | 51                      | 27                       | <b>&lt;0.0001</b> |
| Dead                                 | 9                       | 33                       |                   |
| <b>Relapse status within 5 years</b> |                         |                          |                   |
| No                                   | 34                      | 18                       | <b>0.003</b>      |
| Yes                                  | 26                      | 42                       |                   |

*P* values were calculated using two-sided  $\chi^2$  test.

**Supplementary Table 6. Univariate and multivariate analysis of factors associated with 5-year overall survival in patients with primary HCC.**

| Characteristics                  | Univariate analysis  |                   | Multivariate analysis |                 |
|----------------------------------|----------------------|-------------------|-----------------------|-----------------|
|                                  | HR (95% CI)          | <i>P</i> values   | HR (95% CI)           | <i>P</i> values |
| <b>Gender</b>                    |                      |                   |                       |                 |
| Male vs. Female                  | 1.058 (0.446-2.511)  | 0.899             | 0.788 (0.307-2.020)   | 0.619           |
| <b>Age</b>                       |                      |                   |                       |                 |
| > 45 vs. ≤ 45                    | 0.961 (0.492-1.877)  | 0.907             | 1.306 (0.589-2.892)   | 0.511           |
| <b>Tumor diameter</b>            |                      |                   |                       |                 |
| > 5 cm vs. ≤ 5 cm                | 1.541 (0.836-2.841)  | 0.166             | 1.323 (0.658-2.658)   | 0.432           |
| <b>Tumor number</b>              |                      |                   |                       |                 |
| Multiple vs. Single              | 2.178 (1.187-3.995)  | <b>0.012</b>      | 1.928 (0.970-3.831)   | 0.061           |
| <b>Vascular invasion</b>         |                      |                   |                       |                 |
| Yes vs. No                       | 3.23 (1.716-6.081)   | <b>&lt;0.0001</b> | 2.393 (1.180-4.856)   | <b>0.016</b>    |
| <b>AFP</b>                       |                      |                   |                       |                 |
| ≥ 400 ng/ml vs. < 400 ng/ml      | 2.209 (1.202-4.059)  | <b>0.011</b>      | 1.314 (0.655-2.638)   | 0.422           |
| <b>Degree of differentiation</b> |                      |                   |                       |                 |
| Intermediate and high vs. Low    | 0.703 (0.306-.374)   | 0.303             | 0.782 (0.373-1.639)   | 0.514           |
| <b>Treg/Tef ratio level</b>      |                      |                   |                       |                 |
| High vs. Low                     | 4.915 (2.347-10.291) | <b>&lt;0.0001</b> | 3.888 (1.793-8.432)   | <b>0.001</b>    |

HR, hazard ratio; CI, confidence interval; Statistical analyses were performed using the Cox regression model (two-sided Likelihood ratio test).

**Supplementary Table 7. Univariate and multivariate analysis of factors associated with 5-year relapse-free survival in patients with primary HCC.**

| Characteristics                  | Univariate analysis |                 | Multivariate analysis |                 |
|----------------------------------|---------------------|-----------------|-----------------------|-----------------|
|                                  | HR (95% CI)         | <i>P</i> values | HR (95% CI)           | <i>P</i> values |
| <b>Gender</b>                    |                     |                 |                       |                 |
| Male vs. Female                  | 1.045 (0.518-2.108) | 0.901           | 0.730 (0.341-1.564)   | 0.419           |
| <b>Age</b>                       |                     |                 |                       |                 |
| > 45 vs. ≤ 45                    | 0.890 (0.524-1.511) | 0.666           | 1.097 (0.601-2.004)   | 0.763           |
| <b>Tumor diameter</b>            |                     |                 |                       |                 |
| > 5 cm vs. ≤ 5 cm                | 1.395 (0.866-2.248) | 0.171           | 1.200 (0.698-2.061)   | 0.51            |
| <b>Tumor number</b>              |                     |                 |                       |                 |
| Multiple vs. Single              | 1.502 (0.917-2.460) | 0.106           | 1.280 (0.750-2.184)   | 0.366           |
| <b>Vascular invasion</b>         |                     |                 |                       |                 |
| Yes vs. No                       | 1.685 (1.046-2.715) | <b>0.032</b>    | 1.266 (0.734-2.182)   | 0.396           |
| <b>AFP</b>                       |                     |                 |                       |                 |
| ≥ 400 ng/ml vs. < 400 ng/ml      | 1.615 (0.976-2.613) | 0.062           | 1.266 (0.727-2.202)   | 0.405           |
| <b>Degree of differentiation</b> |                     |                 |                       |                 |
| Intermediate and high vs. Low    | 0.556 (0.327-0.945) | <b>0.03</b>     | 0.524 (0.291-0.943)   | <b>0.031</b>    |
| <b>Treg/Tef ratio level</b>      |                     |                 |                       |                 |
| High vs. Low                     | 2.260 (1.384-3.691) | <b>0.001</b>    | 2.195 (1.295-3.720)   | <b>0.003</b>    |

HR, hazard ratio; CI, confidence interval; Statistical analyses were performed using the Cox regression model (two-sided Likelihood ratio test).

**Supplementary Table 8. The antibodies used in flow cytometry.**

| Antibody / Dye               | Brand            | Cat#         | Dilutions                                    | clone numbers |
|------------------------------|------------------|--------------|----------------------------------------------|---------------|
| Ghost Dye Red780             | TONBO Bioscience | 13-0865-T100 | 1 ul/1 ml                                    | NA            |
| anti-mouse CD45-redFluor 710 | TONBO Bioscience | 80-0451-U100 | 0.25 µg per 10 <sup>6</sup> cells in 100 µl  | 30-F11        |
| anti-mouse CD4-APC           | Biolegend        | 100411       | 0.25 µg per 10 <sup>6</sup> cells in 100 µl  | GK1.5         |
| anti-mouse CD8-PerCP-Cy5.5   | TONBO Bioscience | 65-0081-U025 | 0.25 µg per 10 <sup>6</sup> cells in 100 µl  | 53-6.7        |
| anti-mouse TNF-α-BV421       | Biolegend        | 506328       | 0.25 µg per 10 <sup>6</sup> cells in 100 µl  | MP6-XT22      |
| anti-mouse PD-1-BV510        | Biolegend        | 135241       | 0.25 µg per 10 <sup>6</sup> cells in 100 µl  | 29F.1A12      |
| anti-mouse KI-67-FITC        | eBioscience      | 11-5698-80   | 0.25 µg per 10 <sup>6</sup> cells in 100 µl  | SolA15        |
| anti-mouse CD11b-PE          | Biolegend        | 101207       | 0.25 µg per 10 <sup>6</sup> cells in 100 µl  | M1/70         |
| anti-mouse CD86-APC-CY7      | Biolegend        | 105030       | 0.25 µg per 10 <sup>6</sup> cells in 100 µl  | GL-1          |
| anti-mouse CD11c-PERCP       | Biolegend        | 117325       | 0.25 µg per 10 <sup>6</sup> cells in 100 µl  | N418          |
| anti-mouse MHC-I-APC         | Biolegend        | 114713       | 0.25 µg per 10 <sup>6</sup> cells in 100 µl  | 34-1-2S       |
| anti-mouse IFN-γ-PE-Cy7      | TONBO Bioscience | 60-7311-U100 | 0.125 µg per 10 <sup>6</sup> cells in 100 µl | XMG1.2        |
| anti-mouse SLAMF6-PE         | Biolegend        | 134606       | 1.0 µg per 10 <sup>6</sup> cells in 100 µl   | 330-AJ        |
| anti-mouse PRF1-APC          | Invitrogen       | 17-9392-80   | 1.0 µg per 10 <sup>6</sup> cells in 100 µl   | 17-9392-80    |

|                                 |             |            |                                               |            |
|---------------------------------|-------------|------------|-----------------------------------------------|------------|
| anti-mouse<br>TCF1-PE           | CST         | 14456S     | 1:50                                          | C63D9      |
| anti-mouse<br>F4/80-APC         | Biolegend   | 157306     | 0.5 µg per 10 <sup>6</sup><br>cells in 100 µl | QA17A29    |
| anti-mouse<br>CD206-PERCP-CY5.5 | Biolegend   | 141716     | 0.5 µg per 10 <sup>6</sup><br>cells in 100 µl | C068C2     |
| anti-mouse<br>CXCR3-BV421       | Biolegend   | 126521     | 0.5 µg per 10 <sup>6</sup><br>cells in 100 µl | CXCR3-173  |
| anti-mouse<br>GZMB-FITC         | Biolegend   | 372206     | 5 µl per 10 <sup>6</sup><br>cells in 100 µl   | QA16A02    |
| anti-human<br>CD3-FITC          | Biolegend   | 317306     | 5 µl per 10 <sup>6</sup><br>cells in 100 µl   | OKT3       |
| anti-human<br>CD8-BV421         | Biolegend   | 301035     | 5 µl per 10 <sup>6</sup><br>cells in 100 µl   | RPA-T8     |
| anti-human<br>GZMB-PE           | eBioscience | 12-8899-41 | 5 µl per 10 <sup>6</sup><br>cells in 100 µl   | GB11       |
| anti-human<br>FOXP3-APC         | eBioscience | 17-4776-42 | 5 µl per 10 <sup>6</sup><br>cells in 100 µl   | 1704776-42 |
| anti-human<br>PD-1-PERCP        | Biolegend   | 329937     | 5 µl per 10 <sup>6</sup><br>cells in 100 µl   | EH12.2H7   |
| anti-human<br>TCF1-PE           | Biolegend   | 655208     | 5 µl per 10 <sup>6</sup><br>cells in 100 µl   | 7F11A10    |

---
